# Supplementary material
Source: PubMed Central journal article supplement (PMC5566303)
Supplement: AnnalsATS.201606-468OC_spencer-segal_data_supplement.pdf [file AnnalsATS.201606-468OC_spencer-segal_data_supplement.pdf]

## **Online Data Supplement**

### **Psychiatric Symptoms in Survivors of the Acute Respiratory Distress Syndrome: Effects of Age, Sex, and Immune Modulation**

Joanna L. Spencer-Segal, M.D., Ph.D., Robert C. Hyzy, M.D., Theodore J. Iwashyna, M.D., Ph.D., and Theodore J. Standiford, M.D.

**Table E1** Comparison of sampled and non-sampled survivors

---

|                    | <b>Median (Interquartile Range)</b> |                          |
|--------------------|-------------------------------------|--------------------------|
|                    | <b>Followed up</b>                  | <b>Did not follow up</b> |
| Age                | 50 (32-58)                          | 46 (37-56)               |
| Sex (% male)       | 56.8                                | 55                       |
| Race (%)           |                                     |                          |
| Caucasian          | 65.3                                | 76.4                     |
| Black              | 20.4                                | 21.8                     |
| Hispanic           | 0                                   | 1.8                      |
| Other              | 4.1                                 | 0                        |
| Etiology (%)       |                                     |                          |
| Pneumonia          | 27.3                                | 36.4                     |
| Sepsis             | 27.3                                | 25.4                     |
| Aspiration         | 15.9                                | 16.3                     |
| Other              | 29.5                                | 21.8                     |
| APACHE III         | 53 (44-66)                          | 51 (45-61.5)             |
| Ventilator Free    |                                     |                          |
| Days               | 17 (6-22.75)                        | 16 (0-23)                |
| Organ Failure Days | 6 (2-19.5)                          | 9 (2-21)                 |

---

**Table E2** Correlations between clinical variables and psychiatric symptom scores

---

|                      | <b>Correlation coefficient (p-value)</b> |                        |                     |                        |
|----------------------|------------------------------------------|------------------------|---------------------|------------------------|
|                      | <b>PTSS-10</b>                           | <b>Impact of Event</b> | <b>HADS-anxiety</b> | <b>HADS-Depression</b> |
| Age                  | -.544* (<.001)                           | -.464* (.002)          | -.444* (.003)       | -.224 (.149)           |
| Steroid Days         | -.127 (.410)                             | -.102 (.514)           | -.188 (.227)        | -.103 (.510)           |
| APACHE III           | .074 (.635)                              | .230 (.137)            | .214 (.167)         | .099 (.526)            |
| Ventilator Free Days | -.093 (.548)                             | -.148 (.342)           | -.210 (.176)        | -.182 (.242)           |
| Organ Failure Days   | -.110 (.478)                             | -.038 (.811)           | .040 (.801)         | -.039 (.805)           |

---

**Table E3** R squared values

---

|                 | <b>R<sup>2</sup></b> | <b>Predicted R<sup>2</sup></b> |
|-----------------|----------------------|--------------------------------|
| PTSS-10         | 42.51                | 24.17                          |
| Impact of Event | 46.38                | 29.51                          |
| HADS-Anxiety    | 35.99                | 14.76                          |
| HADS-Depression | 17.65                | 0                              |

---
